# Supplementary material
Source: MDPI journal article supplement (https://www.mdpi.com/2504-5377/6/1/3)
Supplement: s1 [file s1]

## Supplementary Materials

# Microrheology to Understand the Viscosity Behavior of a Sophorolipid Biosurfactant

Jochen Kleinen, Jan Langwald, Joachim Venzmer and Hacer Yalcinkaya

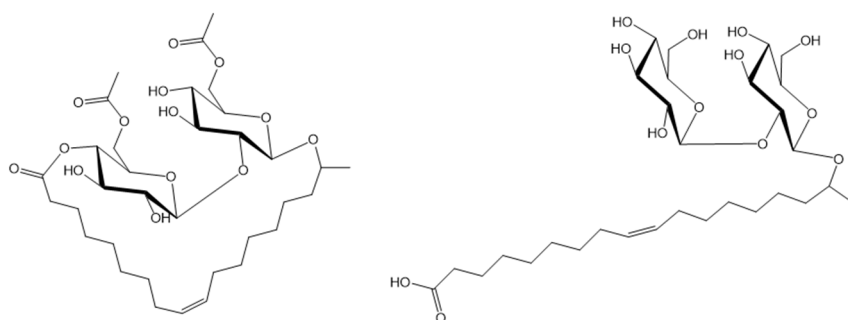

**Figure S1.** Chemical structures of different Sophorolipid types left) lactone (fully acetylated, right) acidic (deacetylated) form of SL.

**Table S1.** Particle size (D:Diameter) and polydispersity index (PDI) of SL from DLS.

| Conc.<br>%(w/w) | D/nm<br>pH 3 | PDI<br>pH 3 | D/nm<br>pH 8 | PDI<br>pH 8 |
|-----------------|--------------|-------------|--------------|-------------|
| 5               | 12.3         | 0.05        | 4.50         | 0.07        |
| 10              | 18.0         | 0.05        | 5.22         | 0.16        |
| 15              | 22.9         | 0.10        | 5.64         | 0.11        |
| 20              | 28.7         | 0.10        | 6.78         | 0.17        |
| 30              | 36.3         | 0.20        | 10.1         | 0.25        |
| 40              | 43.8         | 0.16        | 15.7         | 0.22        |

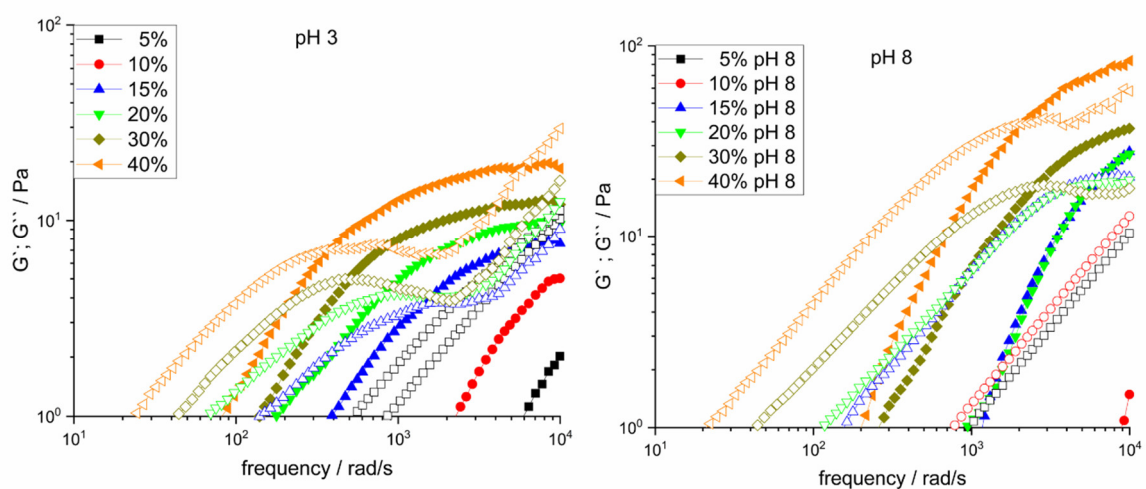

**Figure S2.** Evolution of frequency response of  $G'$  (filled),  $G''$  (open symbols) of Sophorolipid (SL) in water at different concentrations (mass %) at left pH 3 right pH 8.

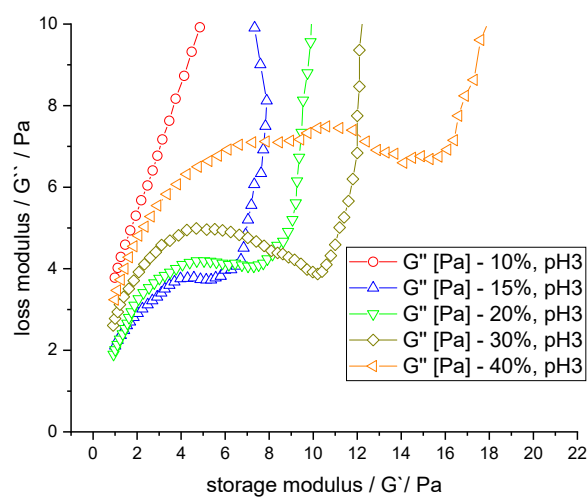

**Figure S3.** Cole-Cole plot of loss modulus vs storage modulus for different concentration of Sophorolipid at pH 3.

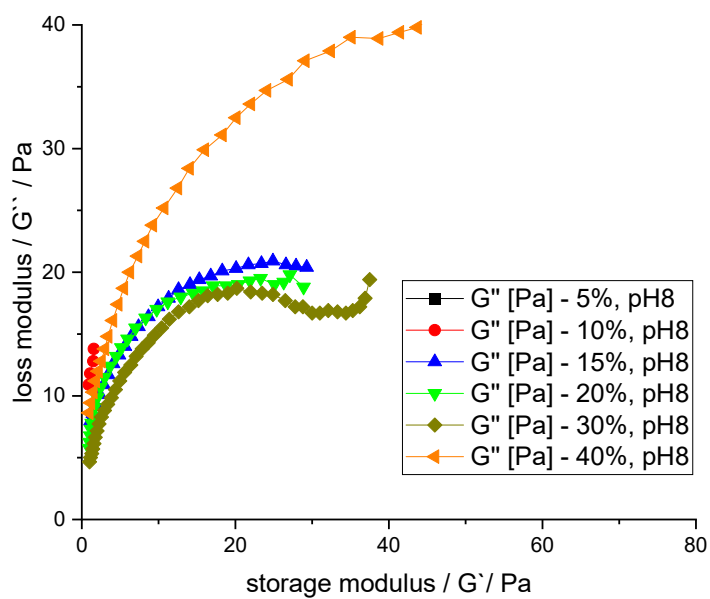

**Figure S4.** Cole-Cole plot of loss modulus vs storage modulus for different concentration of Sophorolipid at pH 8.

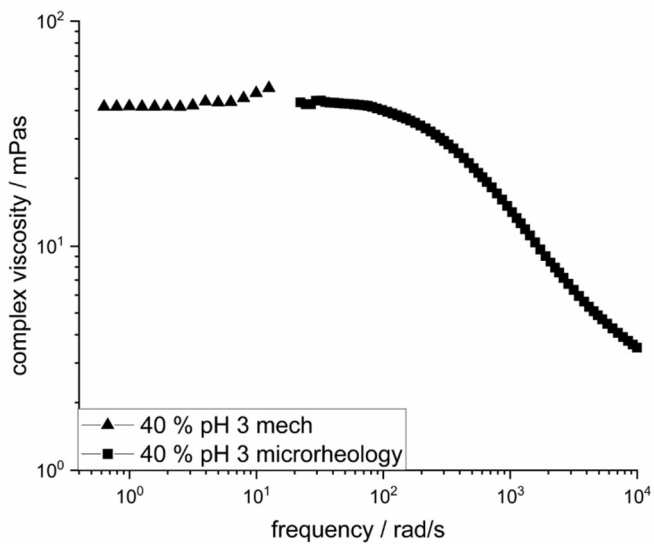

**Figure S5.** Complex viscosity from combination of classical rheology and microrheology, 40 % SL pH 3.

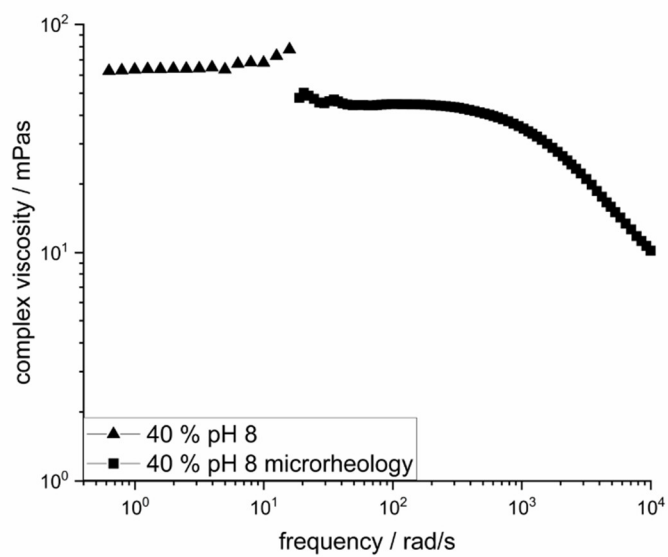

**Figure S6.** Complex viscosity from combination of classical rheology and microrheology, 40 % SL pH 8.

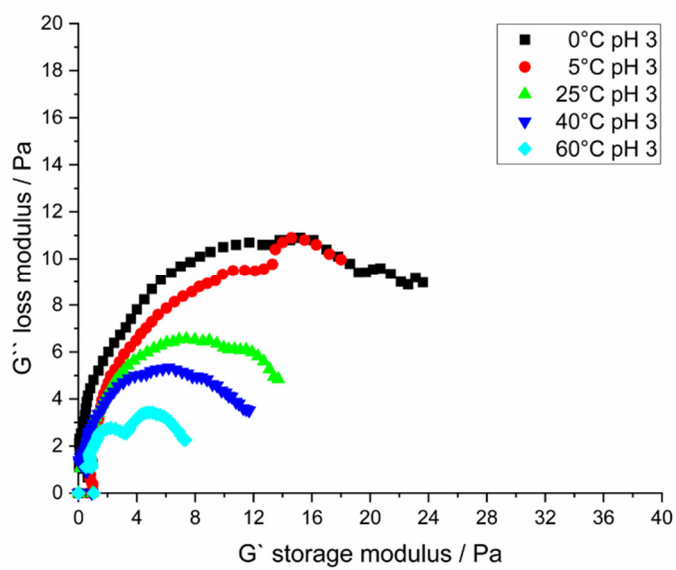

**Figure S7.** Cole-Cole plot of loss modulus vs storage modulus for 40 % SL pH 3 for different temperatures.

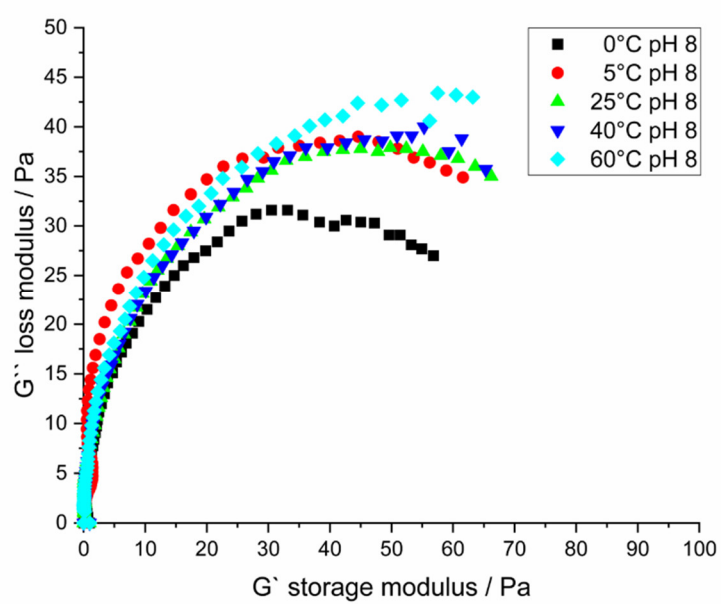

**Figure S8.** Cole-Cole plot of loss modulus vs storage modulus for 40 % SL pH 8 for different temperatures.
